# Supplementary material for: The characteristics of a porcine mitral regurgitation model
Source: PubMed Central journal article supplement — Exp Anim. 2018 May 22;67(4):463–77. doi: 10.1538/expanim.18-0045 (PMC6219876; doi:10.1538/expanim.18-0045), 2018-05-22
Supplement: expanim-67-463-s001.pdf [file expanim-67-463-s001.pdf]

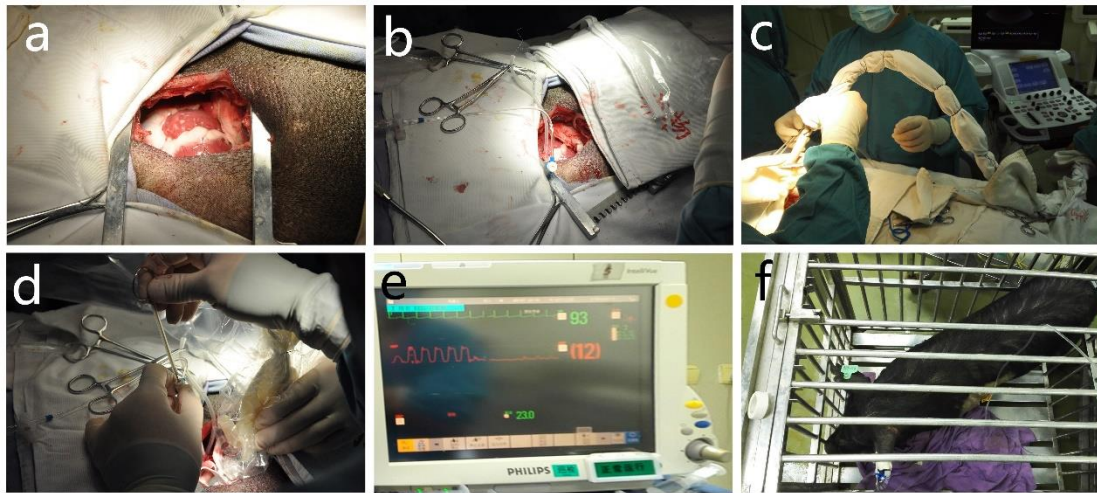

**Supplementary fig 1:** Surgical procedure of mitral regurgitation model

a. Left anterolateral thoracic incision to expose left atrial appendage; b. Measurement of left atrial pressure before operation. The arrow indicates piezometric pipe. c. Epicardial ultrasound monitoring with esophageal ultrasound probe; d. Cutting operation of mitral chordae tendineae; e. Intraoperative display of atrial and ventricular pressure waves; f, Experimental animal after operation.
